# Supplementary material for: One-step synthesis of a hierarchical Bi2S3 nanoflower\In2S3 nanosheet composite with efficient visible-light photocatalytic activity
Source: Royal Society of Chemistry journal article supplement (doi:10.1039/c5ce01747e), 2015-01-01
Supplement: c5ce01747e1.pdf [file c5ce01747e1.pdf]

## Electronic Supplementary Information

### **One-step synthesis of hierarchical Bi<sub>2</sub>S<sub>3</sub> nanoflower/In<sub>2</sub>S<sub>3</sub> nanosheet composite with efficient visible light photocatalytic activity**

Yajie Chen,<sup>a</sup> Guohui Tian,<sup>\*a,b</sup> Qixin Guo,<sup>a</sup> Rong Li,<sup>a</sup> Taoran Han<sup>a</sup> and Honggang Fu,<sup>\*a</sup>

<sup>a</sup> Key Laboratory of Functional Inorganic Material Chemistry, Ministry of Education of the People's Republic of China, Heilongjiang University, Harbin 150080 P. R. China

<sup>b</sup> Key Laboratory of Chemical Engineering Process & Technology for High-efficiency Conversion, College of Heilongjiang Province, School of Chemistry and Materials Science, Heilongjiang University, Harbin 150080, China

Corresponding author\* E-mail: [tiangh@hlju.edu.cn](mailto:tiangh@hlju.edu.cn); [fuhg@vip.sina.com](mailto:fuhg@vip.sina.com), Tel.: +86 451 8660 4330, Fax: +86 451 8667 3647

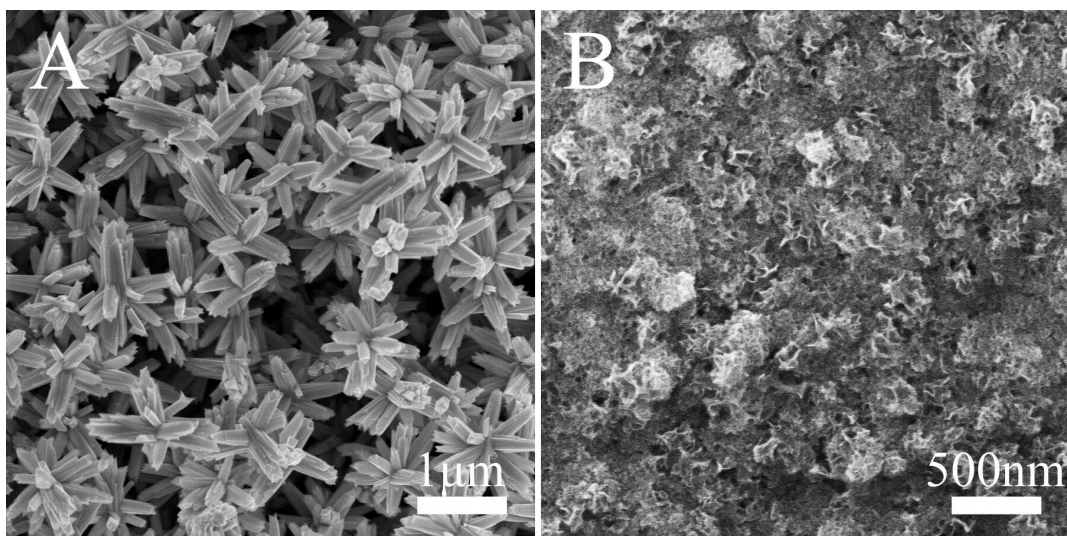

Fig. S1 SEM images of  $\text{Bi}_2\text{S}_3$  (A) and  $\text{In}_2\text{S}_3$  (B).

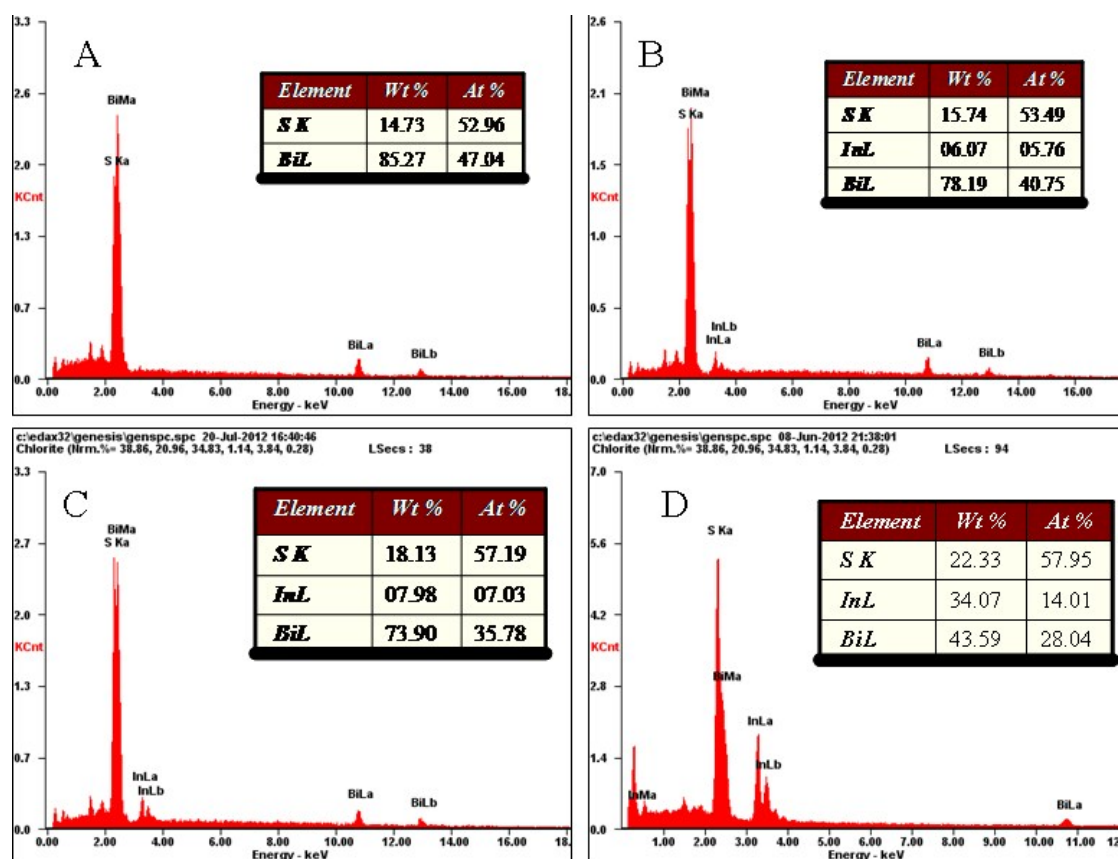

Fig. S2 EDS spectra of the products obtained from the different reaction times, (a) 30 min, (b) 1 h, (c) 4 h, (d) 10 h.

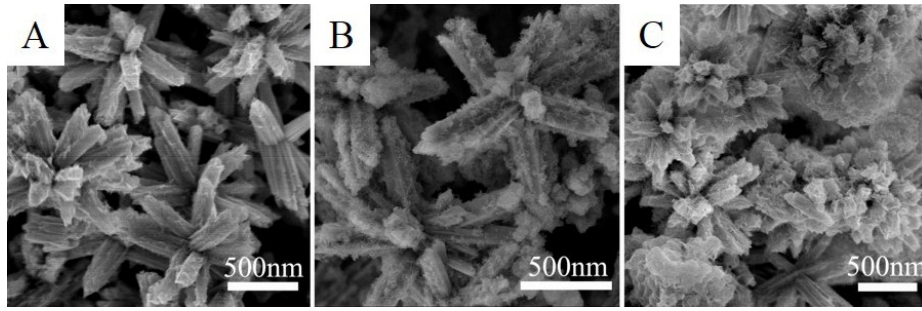

**Fig. S3** SEM images of the  $\text{Bi}_2\text{S}_3/\text{In}_2\text{S}_3$  composites obtained from different mole ratio of Bi salt and In salt, (a) 4:1, (b) 2:1, (c) 1:1.

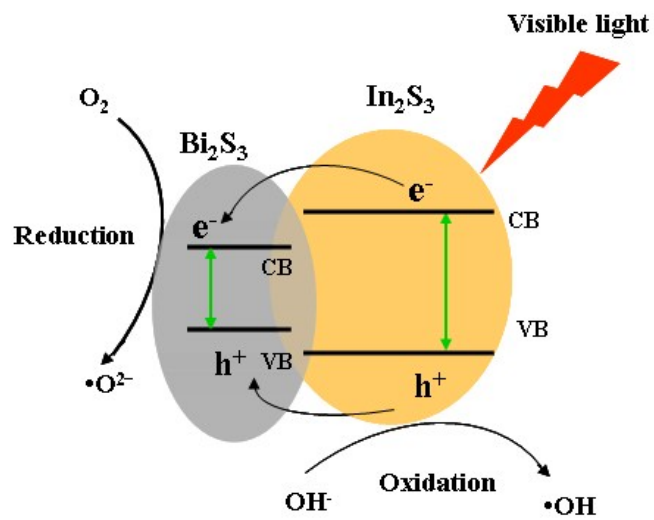

**Fig. S4** Proposed mechanism for photogenerated charges transfer over the  $\text{Bi}_2\text{S}_3/\text{In}_2\text{S}_3$  composite for the pollutants degradation process in aqueous solution under visible-light irradiation.

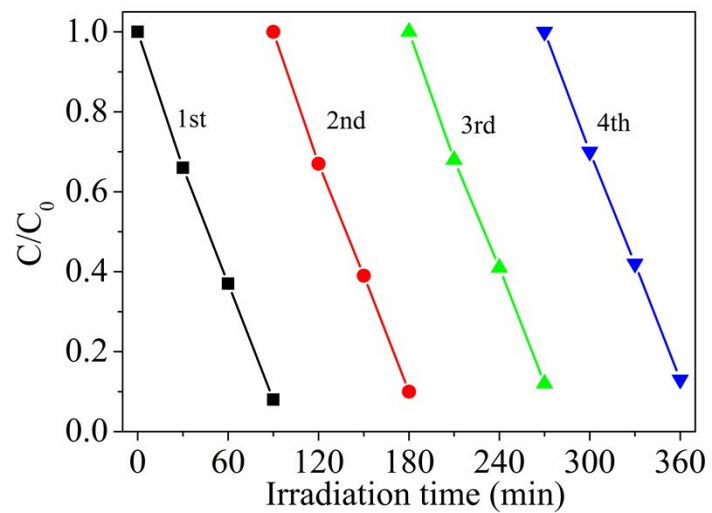

**Fig. S5** Cycling runs in the photocatalytic degradation of 2, 4-dichlorophenol over  $\text{Bi}_2\text{S}_3/\text{In}_2\text{S}_3$  composite (Bi:In=3:1).
